1 **Loss of MECP2 leads to activation of p53 and neuronal senescence**

2 **Ohashi M, Allen D, Lee P, Korsakova E, Fu K, Vargas B, Cinkornpumin J, Salas C, Park J, Germanguz**  
3 **I, Chronis K, Kuoy E, Tran S, Xiao, G, Pellegrini M, Plath K@ and Lowry WE@**

4

5 Department of Molecular Cell and Developmental Biology, UCLA

6 Department of Biological Chemistry, UCLA

7 Eli and Edythe Broad Center for Regenerative Medicine, UCLA

8 Molecular Biology Institute, UCLA

9 Stem Cell Center and Department of Genetics, Yale University

10 Department of Human Genetics, Emory University

11

12 @ To whom correspondence should be addressed/lead contact

13 William Lowry and Kathrin Plath

14

15

16

17

18

19

20

21

22

23

24

25

26

27 **Abstract**

28 To determine the role for mutations of MECP2 in Rett Syndrome, we generated isogenic  
29 lines of human iPSCs (hiPSCs), neural progenitor cells (NPCs), and neurons from patient  
30 fibroblasts with and without MECP2 expression in an attempt to recapitulate disease  
31 phenotypes *in vitro*. Molecular profiling uncovered neuronal specific gene expression  
32 changes including induction of a Senescence Associated Secretory Phenotype (SASP)  
33 program. Patient derived Neurons made without MECP2 show signs of stress, including  
34 induction of p53, and senescence. The induction of p53 appeared to affect dendritic  
35 branching in Rett neurons, as p53 inhibition restored dendritic complexity. These  
36 disease-in-a-dish data suggest that loss of MECP2 can lead to dendritic defects due to  
37 an increase in aspects of neuronal aging.

38

39

40

41

42

43

44

45

46

## 47 **Introduction**

48 Rett Syndrome is a disease associated with loss of function mutations in the gene  
49 MECP2, which was originally identified as encoding a methylated DNA binding protein<sup>1-</sup>  
50 <sup>3</sup>. Patient symptoms include microcephaly, intellectual disability, facial dysmorphia, and  
51 seizure activity<sup>4,5</sup>. Studies in murine models recapitulate many of the patient phenotypes  
52 and have recently identified a role for MECP2 particularly in inhibitory neurons<sup>6-9</sup>. These  
53 studies demonstrated that loss of MECP2 can lead to defects in transcription<sup>10-12</sup>,  
54 dendritic branching<sup>13</sup>, nuclear size<sup>3</sup>, and AKT signaling<sup>14</sup>.

55

56 MECP2 has also been described as a transcription factor with specific targets<sup>10,11,13</sup>, and  
57 more broadly as either a transcriptional activator<sup>14</sup> or repressor<sup>15-18</sup>. However, despite  
58 decades of research on MECP2, it is still unclear how mutations in this protein lead to  
59 patient symptoms<sup>3,14,19-21</sup>. To confirm findings made in other models and further study  
60 these in a human system, some have turned to modeling Rett Syndrome *in vitro* by taking  
61 advantage of Disease in a dish approaches. This involves making hiPSCs from patient  
62 somatic cells, or using genome engineering to introduce mutations into WT human  
63 pluripotent stem cells. In either case, the pluripotent stem cells created are then  
64 differentiated toward the neural lineage, and then comparisons can be made between  
65 cells that express MECP2 or lack it.

66

67 Some of these studies have even taken advantage of isogenic or congenic cells lines to  
68 identify both transcriptional and electrophysiological effects of loss of MECP2 in human

69 *in vitro* models<sup>14,22</sup>. In the current study, we also sought to mitigate the effect of genetic  
70 background and variability of differentiation by taking advantage of several congenic lines  
71 of hiPSCs that either express the WT allele or the mutant allele leading to cells that  
72 express or lack MECP2<sup>23</sup>. This allowed for detailed molecular analyses of hiPSCs, NPCs  
73 and neurons with and without MECP2 under the same genetic background. In addition,  
74 several lines were made and analyzed in each category to avoid variance in differentiation  
75 potential amongst isogenic lines. Furthermore, congenic lines were made from two  
76 patients with different mutations to highlight only those phenotypes associated with loss  
77 of MECP2 expression and not genetic background or variance in hPSC differentiation.  
78 Finally, we validated many of these findings using siRNA silencing of MECP2 in WT cells  
79 of a distinct genetic background. In comparing neurons from Rett patients as well as  
80 those with MECP2 silenced by siRNA, it is clear that loss of MECP2 leads to induction of  
81 p53 and senescence, potentially opening a new avenue of investigation for this  
82 intellectual disability syndrome.

83

## 84 **Results**

### 85 **A congenic model of Rett Syndrome *in vitro***

86 To determine how loss of MECP2 expression leads to defects in the nervous system we  
87 generated a disease-in-a-dish model using iPSCs. Cognizant of the fact that  
88 differentiation from hPSCs is highly variable across individual lines, culture conditions,  
89 and time, we developed an isogenic model to study Rett Syndrome *in vitro* to remove the  
90 confound of genetic background<sup>23</sup>. Because female patients with Rett Syndrome are

91 usually heterozygous for mutant alleles of *MECP2*, fibroblasts isolated from these patients  
92 display a mosaic pattern where roughly half the cells express either the mutant or WT  
93 allele. This is shown in Figure 1A, where fibroblasts isolated from two patients with  
94 distinct mutant alleles of *MECP2* (R982 and R567) showed that roughly half the cells  
95 express *MECP2* while the other half lacked detectable amounts of this protein. One of  
96 these mutant alleles is predicted to lead to a premature stop codon, while the other leads  
97 to failed transcriptional termination. Reprogramming to iPSCs using a small set of  
98 transcription factors has been shown to happen at the clonal level, such that individual  
99 reprogramming events in single fibroblasts generate isolated hiPSC clones<sup>24</sup>. Therefore,  
100 reprogramming of mosaic fibroblast cultures from two different patients generated single  
101 hiPSC clones that either expressed *MECP2* protein or lacked it (Fig 1B) (Method  
102 described in a previous study<sup>25</sup>). In addition, our work and that of others has shown that  
103 under standard conditions, the inactive X chromosome in human fibroblasts does not  
104 reactivate upon reprogramming to the pluripotent state<sup>23,25,26</sup>, which is distinct from  
105 murine reprogramming<sup>27</sup>.

106

107 Thus, we were able to create multiple lines of hiPSCs with and without *MECP2* from  
108 individual patients and thereby control for differences in genetic background (shown in  
109 Fig 1B are clones made from patient 982, clones from 567 look similar). The hiPSCs  
110 generated from fibroblasts of both patients appeared to be unaffected by the lack of  
111 *MECP2*, expressed all appropriate markers, and successfully generated teratomas upon  
112 injection into the testes of immunocompromised mice, consistent with previous hiPSC  
113 models for loss of *MECP2* (Fig S1A)<sup>14,28-30</sup>. Lack of *MECP2* in patient- derived cells and

114 specificity of antibody was also confirmed by western blot (Fig S1B). Importantly, we  
115 never observed reactivation of the silenced X chromosome that would have resulted in  
116 re-expression of the WT allele of MECP2 in any cultures regardless of differentiation  
117 status or passage. This is consistent with previous data showing that despite evidence  
118 for erosion of isolated portions of the silenced X chromosome<sup>31</sup>, the portion containing  
119 the MECP2 locus was not affected by reprogramming or differentiation.

120

121 As Rett Syndrome primarily afflicts the nervous system and MECP2 is most highly  
122 expressed in neurons, we first generated neural progenitor cells from all of the hiPSCs  
123 lines following standard protocols<sup>32</sup>. Across at least two lines per patient with and without  
124 MECP2, we measured the rate of neuralization, the morphology of NPCs, and expression  
125 of typical marker genes. We were unable to detect consistent differences in these  
126 properties between multiple clones of both WT and MECP2- lines derived from both  
127 patients (Fig 1C and Fig S1C). Furthermore, the growth rate of NPCs with and without  
128 MECP2 was not consistently different in NPCs made from either patient (Fig S1D). Next,  
129 the NPCs were further differentiated by a non-directed differentiation approach that yields  
130 both neurons and glia (growth factor withdrawal<sup>33</sup>) (Fig 1D). All NPCs from both patients  
131 produced neurons and glia at the same rate (Fig S1E and F).

132

133 Previous studies have also shown that loss of MECP2 in neurons can lead to a decrease  
134 in AKT signaling<sup>14</sup>. A similar pattern was observed here in mutant neurons generated  
135 from Rett patient hiPSCs as measured by phosphorylation of AKT and S6, while hiPSCs

136 themselves did not seem to be affected by loss of MECP2 (Fig 1E). Dendritic complexity  
137 has been shown extensively to be reliant on MECP2 expression in various models of Rett  
138 Syndrome, and we found a statistically significant decrease in complexity in neurons  
139 made in the absence of MECP2 by Sholl assay (Fig 1F). In addition, we observed  
140 qualitative differences in basic neuronal morphology between WT and mutant neurons,  
141 where the neurons lacking MECP2 had shorter, thicker processes, and their soma was  
142 not as well defined.

143

#### 144 **Loss of MECP2 affects the transcriptome of neurons**

145 It has been suggested that loss of MECP2 only affects gene expression in neurons as  
146 opposed to the hPSCs and NPCs from which they were derived<sup>14</sup>. We sought to  
147 determine whether gene expression was affected in hiPSCs, NPCs or neurons in this  
148 patient derived *in vitro* model. To optimize the search for molecular effects of loss of  
149 MECP2 in hiPSCs, NPCs or neurons, we used defined neuronal cultures by following the  
150 newly established 3i (three inhibitor) method to create populations of human interneurons  
151 (Fig 2A)<sup>34</sup>. Interneurons are particularly relevant in the study of Rett Syndrome as  
152 interneuron-specific deletion of *Mecp2* in mice recapitulates many of the disease  
153 symptoms<sup>6,8,35,36</sup>. We validated the purity and quality of differentiation at each step by  
154 immunostaining for markers typical of particular cell types (SOX2, SOX1 and NESTIN as  
155 well as FOXG1 and NKX2.1 for NPCs; and Tuj1, MAP2 and GABA for interneurons) in  
156 both WT and MUT cultures followed by quantification (Fig S2A and B). We first assessed  
157 whether interneurons lacking MECP2 also showed diminished dendritic branching. In

158 fact, in patient-derived interneurons made by 3i, defects in dendritic branching as  
159 measured by the number of endpoints were clearly observed (Fig 2A).

160

161 We therefore proceeded with deep RNA seq (>120 million reads per sample) of hiPSC,  
162 NPC and interneuron cultures. With such sequencing depth, it was possible to analyze  
163 the RNA-seq reads for the known mutations present in the patients from which these lines  
164 were made (Fig S2C). This analysis demonstrated that each line studied expressed  
165 strictly either the WT or mutant allele of MECP2, and that XCI status was unchanged even  
166 after extensive differentiation to neurons.

167

168

169 We quantified the expression level of MECP2 in WT cells across these three stages of  
170 development and found that the average RPKM was 3.1 for hiPSCs, 4.3 for NPCs, and  
171 7.75 for interneuron cultures. This is consistent with consensus that MECP2 is enriched  
172 in neuronal cells, but also demonstrates that it could potentially be relevant to hiPSC and  
173 NPC physiology as well. However, high stringency analyses (FDR <0.05) of the RNA-  
174 seq data yielded very few gene expression changes due to loss of MECP2 in hiPSCs or  
175 NPCs derived from Rett patients (Fig 2B), consistent with Li et al<sup>14</sup>. On the other hand,  
176 interneuron cultures made from patient 982 showed many gene expression changes  
177 when comparing two individual WT and MUT clones (Fig 2B). Gene ontology analysis  
178 uncovered many neuronal physiology- related pathways were downregulated due to loss



179 of MECP2 in neurons, while genes associated with extracellular remodeling and cell  
180 migration appeared to be induced (Fig 2C).

181

182 Probing RNA-seq data, we also found that MECP2 null interneuron cultures showed a  
183 strong increase in a group of genes that are known to be induced by senescent cells,  
184 known as the Senescence Associate Secretary Program (SASP). The vast majority of  
185 SASP genes that were changed in MECP2 null neurons were upregulated as opposed to  
186 downregulated, suggesting a strong pattern of SASP induction (Fig 2D). The only  
187 previous report linking MECP2 loss to senescence was performed by partial silencing of  
188 this protein in mesenchymal stem cells, but the results were consistent with those shown  
189 here for patient derived MECP2 null fibroblasts<sup>37</sup>. The induction of SASP was intriguing  
190 in light of the fact that, while attempting to make clones of fibroblasts from patients with  
191 Rett syndrome, we repeatedly found that clones lacking MECP2 did not expand well after  
192 passage (14 MECP2 null clones were created, none expanded), while clones expressing  
193 the WT allele expanded without problem (42 MECP2+ clones were created, and 4 out of  
194 4 all expanded).

195

196 To determine whether MECP2 null fibroblasts encounter senescence, we performed an  
197 assay to detect endogenous beta-galactosidase, which is known to be a hallmark of this  
198 process<sup>38</sup>. Indeed, MECP2 null fibroblasts showed strong activity in this senescence  
199 assay (Fig 3A). We did not encounter such difficulties with clonal expansion once hiPSCs  
200 or hiPSC-derived NPCs were made from patients, presumably because during

201 reprogramming, telomerase is strongly induced to restore telomere length at least beyond  
202 the critical threshold<sup>39-44</sup>. In fact, our RNA-seq data showed that hiPSCs made from  
203 patients had very high expression of TERT, and NPCs still expressed moderate levels,  
204 while neurons did not express appreciable levels (average RPKM for TERT: hiPSC, 8.8;  
205 NPC, 1.6; neuron, 0.006). Importantly, the same endogenous galactosidase activity  
206 assay on interneurons showed a dramatic increase in senescence activity in neurons  
207 lacking MECP2 (Fig 3B). These data indicate that loss of MECP2 leads to not only  
208 induction of SASP, but also a *bona fide* senescence program in neurons.

209

#### 210 **Induction of P53 in the absence of MECP2**

211 Cellular senescence programs are known to be regulated by p53, which can then activate  
212 various response pathways downstream such as DNA repair and apoptosis<sup>52</sup>.  
213 Interestingly, p53 induction due to telomere shortening was previously shown to cause  
214 defects in dendritic branching<sup>53,54</sup>, which is also the dominant phenotype in Rett  
215 Syndrome. To begin to look for hallmarks of p53 induction in the absence of MECP2, we  
216 performed RT-PCR for p53 related targets in cells with silencing of MECP2 by siRNA (Fig  
217 S3). This assay suggested that decreased MECP2 levels led to induction of p53 related  
218 target genes such as p21, GADD45, DDIT4, and DDB2 (Fig 3C).

219

220 To determine the effect of loss of MECP2 in relation to cell stress pathways at the protein  
221 level, we performed immunostaining for H2aX, PML, p53, and p21 in neurons with and  
222 without MECP2. Staining for each of these markers showed strong increases in

223 expression/levels of these markers of cell stress in patient-derived NPCs, neurons, and  
224 also after silencing of MECP2 in both NPCs and neurons (Fig 4A-D). WT NPCs with  
225 silencing of MECP2 by siRNA and neurons lacking MECP2 also showed clear induction  
226 of these marks.

227

## 228 **Blocking induction of P53 can rescue dendritic branching defects due to loss of** 229 **MECP2**

230 Previous evidence from a murine model of telomere shortening as a result of loss of  
231 telomerase complex (TERT) led to defects in dendritic branching, and this effect was  
232 strictly dependent on induction of p53<sup>54</sup>. A more recent study also showed that  
233 experimentally aging the neural lineage with telomerase inhibition led to neurons with  
234 signs of aging, including reduced dendritic branching<sup>55</sup>. Therefore, we posited that  
235 inhibition of P53 in MECP2 null neurons could potentially restore appropriate dendritic  
236 branching.

237

238 To determine whether blocking the action of P53 could improve dendritic branching in  
239 MECP2 null interneurons, we took advantage of Pifithrin- $\alpha$ , a potent inhibitor of P53 target  
240 gene activation<sup>56</sup>. Treatment of MECP2 null interneurons with Pifithrin- $\alpha$  showed  
241 evidence of p53 inhibition as measured by RT-PCR for GADD45<sup>52</sup>, a target gene  
242 important for DNA repair (Fig 4E). After 24-48 hours of p53 inhibition by Pifithrin- $\alpha$ ,  
243 MECP2 null interneurons appeared to adopt an improved neuronal morphology typified

244 by increased physical distinction between the soma and neurites, longer, thinner neurites,  
245 as well as increased dendritic branching as shown and quantified in Fig 4E. These data  
246 provide evidence that neurons with shortened telomeres due to loss of MECP2 respond  
247 by inducing P53 activity, which then inhibits the formation of complex neuronal processes.

248

249

## 250 **Discussion**

251 Taken together, these data demonstrate that loss of MECP2 leads to clear signs of stress  
252 such as H2aX deposition, p53/p21 induction, and initiation of a senescence program, all  
253 of which suggest that neurons in Rett Syndrome could be in suboptimal health, leading  
254 to neurophysiological defects such as dendritic arborization<sup>13,20</sup>. While one paper  
255 suggested that RNAi-mediated silencing of MECP2 could affect the telomeres of  
256 mesenchymal cells<sup>37</sup>, decades of work on Rett Syndrome have not uncovered a role for  
257 MECP2 in relation to senescence in a wide variety of models such as various transgenic  
258 mouse line, human patient post-mortem analyses, *in vitro* human models.

259

260 Patients with Rett Syndrome are typically characterized by normal development at birth  
261 and subsequent failure to thrive leading to microcephaly and intellectual disability that  
262 develops with age. As a result, Rett Syndrome is thought to be caused by experience-  
263 dependent loss of neuronal function, which would correlate with data suggesting that  
264 MECP2 regulates activity dependent gene expression<sup>10,13,57</sup>. The microcephaly has been

265 proposed to be a function of decreased nuclear size and dendritic arborization of affected  
266 neurons<sup>13,20</sup>. Could the induced senescence caused by loss of MECP2 described here  
267 underlie patient phenotypes? Several studies have looked at the effects of telomere  
268 shortening specifically in the neural lineage and found consistently that upregulation of  
269 p53 correlates decreased dendritic arborization<sup>53,54,58</sup>, a phenotype widely described to  
270 afflict MECP2 null neurons *in vitro* and *in vivo* (Fig 1).

271

272 These results also raise the question of whether senescence could be common to the  
273 etiologies of other ID syndromes. The phenotypes described here show a striking  
274 similarity to those observed in hiPSCs and neural derivatives made from patients with  
275 Immunodeficiency, centromeric region instability, facial anomalies syndrome (ICF)  
276 Syndrome<sup>59-61</sup>. Two independent studies showed that ICF patient-derived hiPSCs  
277 displayed telomere shortening that was coupled to senescence of somatic derivatives  
278 such as fibroblasts. ICF Syndrome only partially overlaps with Rett Syndrome in terms  
279 of patient phenotypes, but is caused by mutations in DNMT3B, a *de novo* DNA  
280 methyltransferase<sup>62</sup>. These findings together are highly relevant as DNMT3B is a key *de*  
281 *nov*o methyl transferase to create methylated DNA (5mC), which is the substrate for Tet  
282 oxigenases to create 5-hydroxymethylated DNA (5hmC), which is known to be strongly  
283 bound by MECP2<sup>63</sup>. Recently, another study showed that deletion of Tet enzymes, which  
284 are critical to generate the 5hmC mark, led to shortened telomeres<sup>64,65</sup>. These studies  
285 suggest that DNA hydroxymethylation could be important in the regulation of telomere  
286 length. Because MECP2 is a methylated DNA-binding protein, it is tempting to speculate  
287 that alterations of methylation lead to defective telomere maintenance.

288

289 Another possible interpretation of these data is that instead of a failure to mature, Rett  
290 Syndrome neurons instead show aspects of premature aging. The fact that MECP2 null  
291 neurons show induction of aging related genes including p53, and induce senescence  
292 pathways are consistent with this idea<sup>76</sup>. On the other hand, while Rett patients suffer  
293 from a post-natal cognitive decline, and long term survivors show phenotypes associated  
294 with Parkinson's disease<sup>78</sup>, the typical phenotypes presented in young female patients  
295 are not consistent with premature aging. Whether the physiological response to loss of  
296 MECP2 is truly akin to premature aging or whether patients suffer from the effects that  
297 are unrelated to aging is worthy of continued investigation.

298

299 Regardless, it is tempting to speculate that treatments that could abrogate the p53  
300 mediated stress response could potentially ameliorate patient outcomes. Pifithrin- $\alpha$  has  
301 already been shown to be an effective treatment to restore neuronal function in murine  
302 models of injury or stroke<sup>79-81</sup>. Significant future effort will be devoted to determining both  
303 whether telomere dysfunction is a common trigger for ID Syndromes.

304

### 305 **Acknowledgements**

306 This work was funded by training grants to MO (NIH-Virology and Gene Therapy, UCLA),  
307 PL (CIRM, UCLA), CS (CIRM-Bridges, Cal-State-Northridge), DA (HHURP, UCLA). WEL  
308 was supported by a Rose Hills Scholar award through the Eli and Edythe Broad Center

309 for Regenerative Medicine. WEL and KP were supported by NIH (P015P01GM099134).  
310 This research was also supported by the Allen Distinguished Investigator Program,  
311 through The Paul G. Allen Frontiers Group.

312

## 313 **Materials and Methods**

### 314 *Generation of isogenic Rett Syndrome iPSCs*

315 Two primary fibroblast lines GM17567 (1461A>G in the gene encoding methyl-CpG  
316 binding protein 2 (MECP2)), and GM07982 (frameshift mutation, 705delG, in the gene  
317 encoding methyl-CpG binding protein 2 (MECP2)), from patients with Rett Syndrome  
318 were obtained from Coriell Cell Repositories.  $1 \times 10^5$  fibroblasts were plated in a gelatin  
319 coated well of a 6 well plate in MEF media (DMEM/F12 + 10% FBS). After 8-12 hours,  
320 the cells were infected with reprogramming lentivirus that harbors polycistronic human  
321 Yamanaka factors (Oct4, Klf4, Sox2, cMyc) in DMEM medium containing 10ug/ml of  
322 polybrene and incubated overnight at 37°C in 5% CO<sub>2</sub> incubator. The following day, the  
323 viral media was aspirated, replaced with MEF media and cultured for 3 additional days.  
324 Cells were re-plated on the 5th day onto irradiated MEFs in MEF media. On day 6, the  
325 culturing media was changed to human ES media containing DMEM/F12 supplemented  
326 with L-glutamine, nonessential amino acids (NEAA), penicillin-streptomycin, knockout  
327 serum replacement (Invitrogen), and 10 ng/ml basic FGF. Cells were cultured in hiPSC  
328 media until iPSC-like colonies were formed. Reprogrammed colonies were further  
329 identified by live immunofluorescence staining with TRA-1-81 (Chemicon) then  
330 mechanically isolated. Individual colonies were isolated and maintained for at least 2

331 passages before genotyping analysis. For early passages, the iPSCs were propagated  
332 mechanically, whereas collagenase was used for subsequent passaging. hiPSCs were  
333 cultured as described previously in accordance with the UCLA ESCRO.

334

### 335 *Generation of teratomas*

336 Generation of teratoma was previously described<sup>82</sup>. Briefly, a single incision was made in  
337 the peritoneal cavity of adult SCID mice and the testis was explanted through the incision  
338 site. Approximately 60,000 iPSC in a volume of 50 ml 0.5X Matrigel (BD) were  
339 transplanted into the testis using a 27-gauge needle. Four to six weeks after surgery,  
340 mice were euthanized and the tumors removed for histology. Surgery was performed  
341 following Institutional Approval for Appropriate Care and use of Laboratory animals by the  
342 UCLA Institutional Animal Care and Use Committee (Chancellor's Animal Research  
343 Committee (ARC)).

344

### 345 *Differentiation in vitro and analysis*

346 Neural specification with neural rosette derivation, neuroprogenitor (NPC) purification,  
347 and further differentiation to neurons and glia were performed as described previously  
348 <sup>32,83,84</sup>. Relative neuralization efficiency was analyzed by counting the number of neural  
349 rosette containing colonies over total number of iPSC colonies. 6-12 35 mm wells were  
350 analyzed over four separate experiments. The proliferation efficiency of NPCs was  
351 determined by at days 1, 3, and 5 by the total number of cells present in 35mm wells



352 seeded at 200,000 cells on day 0. The cells were detached from the plates using  
353 accutase (Millipore) then total number of cells per well analyzed using Z1 Coulter particle  
354 counter (Beckman Coulter).

355

356 For spontaneous terminal neuronal differentiation by growth factor withdrawal, NPC  
357 cultures were subjected to growth factor withdrawal (removal of EGF and FGF) and  
358 cultured in basic medium (DMEMF12 + N2 + B27) with three quarter exchange of media  
359 every three days. Cells were cultured up to 20 weeks. Neural differentiation efficiency  
360 was analyzed four weeks after growth factor withdrawal by counting the number of cells  
361 positive for neuronal markers (MAP2 and Tuj1) over the total number of cells visualized  
362 by DAPI. NPCs were transfected with DCX-GFP reporter one day prior to differentiation  
363 using Lipofectamine 2000 (Invitrogen). Sholl analysis of DCX-GFP positive neuronal  
364 neuritis were also measured using ImageJ. All data values were presented as mean +/-  
365 SEM. Student's t-tests were applied to data with two groups. ANOVA analyses were used  
366 for comparisons of data with greater than two groups.

367

368 For directed differentiation of interneurons, iPSCs were grown on plates coated with  
369 matrigel (Corning) until 80% confluency with mTeSR (Stem Cell Technologies). Cells  
370 were then treated with DMEM/F12 (GIBCO) containing NEAA (GIBCO), GlutaMAX  
371 (GIBCO), bovine serum albumin (Sigma-Aldrich),  $\beta$ -mercaptoethanol (Sigma-Aldrich), N2  
372 (GIBCO), B27 (GIBCO), SB431542 (10uM; Cayman Chemical), LDN-193189 (100nM;  
373 Cayman Chemical) and XAV939 (2uM; Cayman Chemical) later transitioning to the media

374 containing sonic hedgehog (20ng/mL; R&D) and purmorphamine (1uM; Cayman  
375 Chemical) as previously described (Maroof et al., 2013). Cells were further differentiated  
376 into interneurons with neurobasal medium (GIBCO) containing N2 (GIBCO), B27  
377 (GIBCO), ascorbic acid (Sigma-Aldrich), GlutaMAX (GIBCO), bovine serum albumin  
378 (Sigma-Aldrich),  $\beta$ -mercaptoethanol (Sigma-Aldrich), neurotrophin-3 (10ng/mL; R&D),  
379 brain-derived neurotrophic factor (10ng/mL; R&D), and glial cell-derived neurotrophic  
380 factor (10ng/mL; R&D).

381

### 382 *Western blot*

383 Cells were lysed on ice with RIPA buffer (Pierce) that contains Halt Protease Inhibitor  
384 Cocktail (Thermo Fisher Scientific) and Halt Phosphatase Inhibitor Cocktail (Thermo  
385 Fisher Scientific). The total protein concentration was measured using BCA Protein  
386 Assay Kit (Thermo Fisher Scientific) following the manufacturer's protocol. The lysates  
387 containing the equal amount of total protein were mixed with NuPAGE sample buffer  
388 (Invitrogen) with 5% mercaptoethanol and denatured at 95 °C for 10 min. Supernatant  
389 was electrophoresed onto NuPAGE 4-12% Bis-Tris Protein Gels (Invitrogen) using MOPS  
390 running buffer (Invitrogen). Gels were then electroblotted using semi-dry transfer  
391 apparatus onto a membrane. The membrane was blocked with 5% non-fat milk for 1 hr  
392 and incubated overnight with primary antibodies at 4°C. The next day the membrane was  
393 washed and incubated with HRP-conjugated secondary antibodies for 1 hr at room  
394 temperature. The membrane was then incubated with ECL Western Blotting Substrate  
395 and developed.

396

397 *Immunofluorescence and image quantification*

398 Cells on coverslips were washed with PBS, fixed in 4% paraformaldehyde for 15 min at  
399 room temperature, blocked for 1 hr at room temperature with 10% serum and 0.1% Triton-  
400 X-100, then incubated overnight at 4 °C with primary antibodies. Frozen tissue sections  
401 were thawed to room temperature, fixed in 4% paraformaldehyde for 15 min at room  
402 temperature, permeabilized with 0.2% Triton-X-100 for 15 min at room temperature and  
403 blocked with 10% serum at 4 °C overnight, followed by incubation with primary antibodies  
404 at 4 °C for 16-24 hr. Following primary antibody incubation, the coverslips were incubated  
405 with Alexa Fluor (Invitrogen) or Jackson immunoresearch secondary antibodies at room  
406 temperature for 1 hr. Cells were counterstained with DAPI and mounted in Prolong Gold  
407 (ThermoFisher). Antibodies used include the following: mouse anti-OCT3/4 (1:100, Santa  
408 Cruz Biotechnology Inc.), rabbit anti-SOX2 (1:300, Cell Signaling Technology), rabbit anti-  
409 Nanog (1:100, Cell Signaling Technology), mouse anti-Tra-1-81 (1:250, Chemicon),  
410 mouse anti-NESTIN (1:1000, Neuromics), chicken anti-MAP2 (1:2000, Biolegend),  
411 chicken anti-GFAP (1:2000, Abcam), rabbit anti-Tubulin  $\beta$ 3 (1:500, Covance), mouse  
412 anti-p53 (1:500, Cell Signaling), rabbit anti-p21 (1:250, Santa Cruz), mouse anti-PML  
413 (1:100, Santa Cruz), mouse anti-phospho-Histone H2A.X (1:2000, EMD Millipore), rabbit  
414 anti-5hmc (1:100, Active Motif), rabbit anti MECP2 (1:1000, Diagenode), rabbit anti Foxg1  
415 (1:1000, Abcam), and mouse anti NKX2.1 (1:300, Novocastra). Secondary antibodies  
416 conjugated with Alexa 488, 568, 594, 647 (1:500, Life Technologies) were used. Imaging  
417 was performed on Zeiss Axio Imager A1 or Zeiss LSM780 confocal microscope using a  
418 40X or 63X objective on randomly selected cells. Mean intensity or a number of foci were

419 quantified using ImageJ (<http://rsb.info.nih.gov/ij/>). At least 100 cells per condition were  
420 used for each independent experiment.

421

#### 422 *RT-qPCR*

423 RNA from cultured cells was collected using the RNeasy Mini Kit from Qiagen according  
424 to the manufacturer's instructions. The concentration and purity of RNA were measured  
425 using nanodrop spectrophotometers (Thermo Scientific). RNA with an A260/A280 ratio  
426 in between 1.8 and 2.0 as well as an A260/A230 ratio in between 2.0 and 2.2 was used.  
427 RNA was then reverse transcribed using the Super Script III First-Strand cDNA Synthesis  
428 kit with Random Hexamers (Invitrogen) according to the manufacturer's instructions.  
429 Quantitative PCR was performed using SYBR Green master mix (Roche). Primers were  
430 used at a final concentration of 1  $\mu$ M. Reactions were performed in duplicate and  
431 duplicate CT values were averaged and then used for standard  $\Delta\Delta$ CT analysis.  
432 Expression levels were normalized to beta actin.

433

#### 434 *Data collection and statistical analysis*

435 All the experimental data (RT-qPCR, qPCR assay for telomere length, immunostaining,  
436  $\beta$ -Galactosidase Senescence Assay) were presented as mean  $\pm$  SEM based on at least  
437 three biological replicates from independent experiments. Student's t tests were applied  
438 to data with two groups. ANOVA analyses were used for comparisons of data with greater  
439 than two groups. A p value  $< 0.05$  was considered as statistically significant.

440

441 *siRNA gene silencing*

442 All knockdown experiments were performed using trilencer siRNAs (from OriGene  
443 Technologies) and RNAimax (ThermoFisher) in Opti-MEM media (ThermoFisher).  
444 Trilencers were used at a concentration of 20 nM. Transfection media was prepared and  
445 then 500,000 cells were plated on top of the transfection media in 6-well plates. The  
446 medium was changed to normal NPC media the next day and cells were collected for  
447 analysis at the time points indicated.

448

449  *$\beta$ -Galactosidase Senescence Assay*

450  $\beta$ -Galactosidase Senescence Assay was performed using the Senescence  $\beta$ -  
451 Galactosidase Staining Kit from Cell Signaling according to manufacturer's instructions.  
452 Briefly, the cells were fixed on coverslips, incubated with X-gal overnight at 37°C, then  
453 mounted on glass slides and imaged using a brightfield microscope. The number of blue  
454 cells and number of total cells were quantified using the Cell Counter plugin in ImageJ.

455

456

457 *Quantification of Dendritic Arborization*

458 Neuronal cultures were immunostained for Tuj1 in order to identify mature neurons and  
459 visualize entire cells. The stained cells were then imaged at 20x and dendritic arbors of

460 individual cells were traced using the Simple Neurite Tracer plugin for ImageJ. The  
461 number of process ends per cell were counted using the Cell Counter plugin for ImageJ.  
462 Only mature neurons—identifiable by their thin processes and condensed somas—were  
463 used for analysis. The number of process ends per cell are presented as mean ends per  
464 cell +/- SEM. Means were compared using the Student's T-Test for data with two groups.  
465 A p value <0.05 was used as the cutoff for significance.

466

#### 467 *RNA expression profiling*

468 RNA purification was performed with Qiagen RNeasy kit following the manufacturer's  
469 instruction. Libraries were prepared according to the manufacturers guidelines using The  
470 TruSeq V2 kit (Illumina). Microarray profiling was performed with Affymetrix Human HG-  
471 U133 2.0 Plus arrays as described <sup>85</sup>. For RNA sequencing, the datasets were mapped  
472 with RASER and HISAT2. The reads were counted per gene. Genes were defined by the  
473 exon union from the hg19 ensembl annotations. The function of DESeq in DESeq2  
474 package was used to first normalize the gene read counts data and then identified the  
475 differentially expressed genes. The MA plot was generated with the function of plotMA in  
476 DESeq2 package. Q-value of 0.05 is regarded as the stringent cutoff of calling DEGs  
477 while p-value less than 0.05 is regarded as the low stringency cutoff. For the meta-  
478 chromosome plot of DEGs, all the chromosomes (except chromosome Y) were first  
479 divided equally into 20bins with different length, and then the number of DEGs in each  
480 bin was counted. GO analysis was performed using DAVID.

481

482

## 483 References

- 484 1 Meehan, R. R., Lewis, J. D. & Bird, A. P. Characterization of MeCP2, a vertebrate DNA binding  
485 protein with affinity for methylated DNA. *Nucleic Acids Res* **20**, 5085-5092 (1992).
- 486 2 Lewis, J. D. *et al.* Purification, sequence, and cellular localization of a novel chromosomal protein  
487 that binds to methylated DNA. *Cell* **69**, 905-914 (1992).
- 488 3 Chen, R. Z., Akbarian, S., Tudor, M. & Jaenisch, R. Deficiency of methyl-CpG binding protein-2 in  
489 CNS neurons results in a Rett-like phenotype in mice. *Nat Genet* **27**, 327-331, doi:10.1038/85906  
490 (2001).
- 491 4 Bird, A. The methyl-CpG-binding protein MeCP2 and neurological disease. *Biochem Soc Trans* **36**,  
492 575-583, doi:10.1042/BST0360575 (2008).
- 493 5 Chahrour, M. & Zoghbi, H. Y. The story of Rett syndrome: from clinic to neurobiology. *Neuron* **56**,  
494 422-437, doi:10.1016/j.neuron.2007.10.001 (2007).
- 495 6 Tomassy, G. S., Morello, N., Calcagno, E. & Giustetto, M. Developmental abnormalities of cortical  
496 interneurons precede symptoms onset in a mouse model of Rett syndrome. *Journal of*  
497 *neurochemistry* **131**, 115-127, doi:10.1111/jnc.12803 (2014).
- 498 7 Kao, F. C., Su, S. H., Carlson, G. C. & Liao, W. MeCP2-mediated alterations of striatal features  
499 accompany psychomotor deficits in a mouse model of Rett syndrome. *Brain Struct Funct* **220**, 419-  
500 434, doi:10.1007/s00429-013-0664-x (2015).
- 501 8 Goffin, D., Brodtkin, E. S., Blendy, J. A., Siegel, S. J. & Zhou, Z. Cellular origins of auditory event-  
502 related potential deficits in Rett syndrome. *Nat Neurosci* **17**, 804-806, doi:10.1038/nn.3710  
503 (2014).
- 504 9 Kang, S. K., Kim, S. T., Johnston, M. V. & Kadam, S. D. Temporal- and Location-Specific Alterations  
505 of the GABA Recycling System in Mecp2 KO Mouse Brains. *J Cent Nerv Syst Dis* **6**, 21-28,  
506 doi:10.4137/JCNSD.S14012 (2014).
- 507 10 Lee, W. *et al.* MeCP2 regulates activity-dependent transcriptional responses in olfactory sensory  
508 neurons. *Hum Mol Genet* **23**, 6366-6374, doi:10.1093/hmg/ddu358 (2014).
- 509 11 Chen, W. G. *et al.* Derepression of BDNF transcription involves calcium-dependent  
510 phosphorylation of MeCP2. *Science* **302**, 885-889, doi:10.1126/science.1086446 (2003).
- 511 12 Tudor, M., Akbarian, S., Chen, R. Z. & Jaenisch, R. Transcriptional profiling of a mouse model for  
512 Rett syndrome reveals subtle transcriptional changes in the brain. *Proc Natl Acad Sci U S A* **99**,  
513 15536-15541, doi:10.1073/pnas.242566899 (2002).
- 514 13 Zhou, Z. *et al.* Brain-specific phosphorylation of MeCP2 regulates activity-dependent Bdnf  
515 transcription, dendritic growth, and spine maturation. *Neuron* **52**, 255-269,  
516 doi:10.1016/j.neuron.2006.09.037 (2006).
- 517 14 Li, Y. *et al.* Global transcriptional and translational repression in human-embryonic-stem-cell-  
518 derived Rett syndrome neurons. *Cell Stem Cell* **13**, 446-458, doi:10.1016/j.stem.2013.09.001  
519 (2013).
- 520 15 Nan, X. *et al.* Transcriptional repression by the methyl-CpG-binding protein MeCP2 involves a  
521 histone deacetylase complex. *Nature* **393**, 386-389, doi:10.1038/30764 (1998).
- 522 16 Nan, X., Cross, S. & Bird, A. Gene silencing by methyl-CpG-binding proteins. *Novartis Found Symp*  
523 **214**, 6-16; discussion 16-21, 46-50 (1998).
- 524 17 Cross, S. H., Meehan, R. R., Nan, X. & Bird, A. A component of the transcriptional repressor MeCP1  
525 shares a motif with DNA methyltransferase and HRX proteins. *Nat Genet* **16**, 256-259,  
526 doi:10.1038/ng0797-256 (1997).



- 527 18 Nan, X., Campoy, F. J. & Bird, A. MeCP2 is a transcriptional repressor with abundant binding sites  
528 in genomic chromatin. *Cell* **88**, 471-481 (1997).
- 529 19 Marchetto, M. C. *et al.* A model for neural development and treatment of Rett syndrome using  
530 human induced pluripotent stem cells. *Cell* **143**, 527-539, doi:S0092-8674(10)01186-4 [pii]  
531 10.1016/j.cell.2010.10.016 (2010).
- 532 20 Smrt, R. D. *et al.* Mecp2 deficiency leads to delayed maturation and altered gene expression in  
533 hippocampal neurons. *Neurobiol Dis* **27**, 77-89, doi:10.1016/j.nbd.2007.04.005 (2007).
- 534 21 Luikenhuis, S., Giacometti, E., Beard, C. F. & Jaenisch, R. Expression of MeCP2 in postmitotic  
535 neurons rescues Rett syndrome in mice. *Proc Natl Acad Sci U S A* **101**, 6033-6038,  
536 doi:10.1073/pnas.0401626101 (2004).
- 537 22 Farra, N. *et al.* Rett syndrome induced pluripotent stem cell-derived neurons reveal novel  
538 neurophysiological alterations. *Mol Psychiatry* **17**, 1261-1271, doi:10.1038/mp.2011.180 (2012).
- 539 23 Tchieu, J. *et al.* Female human iPS cells retain an inactive X-chromosome. *Cell Stem Cell* **October**  
540 (2010).
- 541 24 Winkler, T. *et al.* No evidence for clonal selection due to lentiviral integration sites in human  
542 induced pluripotent stem cells. *Stem Cells* **28**, 687-694, doi:10.1002/stem.322 (2010).
- 543 25 Sahakyan, A. *et al.* Human Naive Pluripotent Stem Cells Model X Chromosome Dampening and X  
544 Inactivation. *Cell Stem Cell*, doi:10.1016/j.stem.2016.10.006 (2016).
- 545 26 Pasque, V. *et al.* X chromosome reactivation dynamics reveal stages of reprogramming to  
546 pluripotency. *Cell* **159**, 1681-1697, doi:10.1016/j.cell.2014.11.040 (2014).
- 547 27 Maherali, N. *et al.* Directly reprogrammed fibroblasts show global epigenetic remodeling and  
548 widespread tissue contribution. *Cell Stem Cell* **1**, 55-70 (2007).
- 549 28 Dajani, R., Koo, S. E., Sullivan, G. J. & Park, I. H. Investigation of Rett syndrome using pluripotent  
550 stem cells. *J Cell Biochem* **114**, 2446-2453, doi:10.1002/jcb.24597 (2013).
- 551 29 Cheung, A. Y. *et al.* Isolation of MECP2-null Rett Syndrome patient hiPS cells and isogenic controls  
552 through X-chromosome inactivation. *Hum Mol Genet* **20**, 2103-2115, doi:10.1093/hmg/ddr093  
553 (2011).
- 554 30 Hotta, A. *et al.* Isolation of human iPS cells using EOS lentiviral vectors to select for pluripotency.  
555 *Nat Methods* **6**, 370-376 (2009).
- 556 31 Mekhoubad, S. *et al.* Erosion of Dosage Compensation Impacts Human iPSC Disease Modeling.  
557 *Cell stem cell* **10**, 595-609, doi:10.1016/j.stem.2012.02.014 (2012).
- 558 32 Patterson, M. *et al.* Defining the nature of human pluripotent stem cell progeny. *Cell research*,  
559 doi:10.1038/cr.2011.133 (2011).
- 560 33 Patterson, M. *et al.* Defining the nature of human pluripotent stem cell progeny. *Cell Res* **22**, 178-  
561 193, doi:10.1038/cr.2011.133 (2012).
- 562 34 Maroof, A. M. *et al.* Directed differentiation and functional maturation of cortical interneurons  
563 from human embryonic stem cells. *Cell Stem Cell* **12**, 559-572, doi:10.1016/j.stem.2013.04.008  
564 (2013).
- 565 35 Krishnan, K. *et al.* MeCP2 regulates the timing of critical period plasticity that shapes functional  
566 connectivity in primary visual cortex. *Proc Natl Acad Sci U S A* **112**, E4782-4791,  
567 doi:10.1073/pnas.1506499112 (2015).
- 568 36 Ito-Ishida, A., Ure, K., Chen, H., Swann, J. W. & Zoghbi, H. Y. Loss of MeCP2 in Parvalbumin-and  
569 Somatostatin-Expressing Neurons in Mice Leads to Distinct Rett Syndrome-like Phenotypes.  
570 *Neuron* **88**, 651-658, doi:10.1016/j.neuron.2015.10.029 (2015).
- 571 37 Squillaro, T. *et al.* Partial silencing of methyl cytosine protein binding 2 (MECP2) in mesenchymal  
572 stem cells induces senescence with an increase in damaged DNA. *FASEB J* **24**, 1593-1603,  
573 doi:10.1096/fj.09-143057 (2010).



- 574 38 Wang, Z., Wei, D. & Xiao, H. Methods of cellular senescence induction using oxidative stress.  
575 *Methods Mol Biol* **1048**, 135-144, doi:10.1007/978-1-62703-556-9\_11 (2013).
- 576 39 West, M. D. & Vaziri, H. Back to immortality: the restoration of embryonic telomere length during  
577 induced pluripotency. *Regenerative medicine* **5**, 485-488, doi:10.2217/rme.10.51 (2010).
- 578 40 Mathew, R. *et al.* Robust activation of the human but not mouse telomerase gene during the  
579 induction of pluripotency. *FASEB journal : official publication of the Federation of American*  
580 *Societies for Experimental Biology* **24**, 2702-2715, doi:10.1096/fj.09-148973 (2010).
- 581 41 Vaziri, H. *et al.* Spontaneous reversal of the developmental aging of normal human cells following  
582 transcriptional reprogramming. *Regenerative medicine* **5**, 345-363, doi:10.2217/rme.10.21  
583 (2010).
- 584 42 Marion, R. M. & Blasco, M. A. Telomere rejuvenation during nuclear reprogramming. *Curr Opin*  
585 *Genet Dev* **20**, 190-196, doi:10.1016/j.gde.2010.01.005 (2010).
- 586 43 Marion, R. M. *et al.* Telomeres acquire embryonic stem cell characteristics in induced pluripotent  
587 stem cells. *Cell Stem Cell* **4**, 141-154, doi:10.1016/j.stem.2008.12.010 (2009).
- 588 44 Suhr, S. T. *et al.* Telomere dynamics in human cells reprogrammed to pluripotency. *PLoS ONE* **4**,  
589 e8124, doi:10.1371/journal.pone.0008124 (2009).
- 590 45 Lopez de Silanes, I. *et al.* Identification of TERRA locus unveils a telomere protection role through  
591 association to nearly all chromosomes. *Nat Commun* **5**, 4723, doi:10.1038/ncomms5723 (2014).
- 592 46 Thijssen, P. E. *et al.* Chromatin remodeling of human subtelomeres and TERRA promoters upon  
593 cellular senescence: commonalities and differences between chromosomes. *Epigenetics* **8**, 512-  
594 521, doi:10.4161/epi.24450 (2013).
- 595 47 Deng, Z. *et al.* A role for CTCF and cohesin in subtelomere chromatin organization, TERRA  
596 transcription, and telomere end protection. *Embo J* **31**, 4165-4178, doi:10.1038/emboj.2012.266  
597 (2012).
- 598 48 Porro, A., Feuerhahn, S., Reichenbach, P. & Lingner, J. Molecular dissection of telomeric repeat-  
599 containing RNA biogenesis unveils the presence of distinct and multiple regulatory pathways. *Mol*  
600 *Cell Biol* **30**, 4808-4817, doi:10.1128/MCB.00460-10 (2010).
- 601 49 Arnoult, N., Van Beneden, A. & Decottignies, A. Telomere length regulates TERRA levels through  
602 increased trimethylation of telomeric H3K9 and HP1alpha. *Nat Struct Mol Biol* **19**, 948-956,  
603 doi:10.1038/nsmb.2364 (2012).
- 604 50 Azzalin, C. M. & Lingner, J. Telomere functions grounding on TERRA firma. *Trends Cell Biol* **25**, 29-  
605 36, doi:10.1016/j.tcb.2014.08.007 (2015).
- 606 51 Osterwald, S. *et al.* PML induces compaction, TRF2 depletion and DNA damage signaling at  
607 telomeres and promotes their alternative lengthening. *J Cell Sci* **128**, 1887-1900,  
608 doi:10.1242/jcs.148296 (2015).
- 609 52 Vaziri, H. & Benchimol, S. From telomere loss to p53 induction and activation of a DNA-damage  
610 pathway at senescence: the telomere loss/DNA damage model of cell aging. *Exp Gerontol* **31**, 295-  
611 301 (1996).
- 612 53 Zhang, P. *et al.* TRF2 dysfunction elicits DNA damage responses associated with senescence in  
613 proliferating neural cells and differentiation of neurons. *J Neurochem* **97**, 567-581,  
614 doi:10.1111/j.1471-4159.2006.03779.x (2006).
- 615 54 Ferron, S. R. *et al.* Telomere shortening in neural stem cells disrupts neuronal differentiation and  
616 neuritogenesis. *J Neurosci* **29**, 14394-14407, doi:10.1523/JNEUROSCI.3836-09.2009 (2009).
- 617 55 Vera, E., Bosco, N. & Studer, L. Generating Late-Onset Human iPSC-Based Disease Models by  
618 Inducing Neuronal Age-Related Phenotypes through Telomerase Manipulation. *Cell Rep* **17**, 1184-  
619 1192, doi:10.1016/j.celrep.2016.09.062 (2016).
- 620 56 Bassi, L. *et al.* Pifithrin-alpha, an inhibitor of p53, enhances the genetic instability induced by  
621 etoposide (VP16) in human lymphoblastoid cells treated in vitro. *Mutat Res* **499**, 163-176 (2002).

- 622 57 Degano, A. L., Park, M. J., Penati, J., Li, Q. & Ronnett, G. V. MeCP2 is required for activity-  
623 dependent refinement of olfactory circuits. *Mol Cell Neurosci* **59**, 63-75,  
624 doi:10.1016/j.mcn.2014.01.005 (2014).
- 625 58 Batista, L. F. *et al.* Telomere shortening and loss of self-renewal in dyskeratosis congenita induced  
626 pluripotent stem cells. *Nature* **474**, 399-402, doi:10.1038/nature10084 (2011).
- 627 59 Huang, K. *et al.* Selective demethylation and altered gene expression are associated with ICF  
628 syndrome in human-induced pluripotent stem cells and mesenchymal stem cells. *Hum Mol Genet*  
629 **23**, 6448-6457, doi:10.1093/hmg/ddu365 (2014).
- 630 60 Sagie, S. *et al.* Induced pluripotent stem cells as a model for telomeric abnormalities in ICF type I  
631 syndrome. *Hum Mol Genet* **23**, 3629-3640, doi:10.1093/hmg/ddu071 (2014).
- 632 61 Yehezkel, S. *et al.* Characterization and rescue of telomeric abnormalities in ICF syndrome type I  
633 fibroblasts. *Front Oncol* **3**, 35, doi:10.3389/fonc.2013.00035 (2013).
- 634 62 Linhart, H. G. *et al.* Dnmt3b promotes tumorigenesis in vivo by gene-specific de novo methylation  
635 and transcriptional silencing. *Genes Dev* **21**, 3110-3122, doi:10.1101/gad.1594007 (2007).
- 636 63 Mellen, M., Ayata, P., Dewell, S., Kriaucionis, S. & Heintz, N. MeCP2 binds to 5hmC enriched within  
637 active genes and accessible chromatin in the nervous system. *Cell* **151**, 1417-1430,  
638 doi:10.1016/j.cell.2012.11.022 (2012).
- 639 64 Yang, J. *et al.* Tet Enzymes Regulate Telomere Maintenance and Chromosomal Stability of Mouse  
640 ESCs. *Cell Rep* **15**, 1809-1821, doi:10.1016/j.celrep.2016.04.058 (2016).
- 641 65 Lu, F., Liu, Y., Jiang, L., Yamaguchi, S. & Zhang, Y. Role of Tet proteins in enhancer activity and  
642 telomere elongation. *Genes Dev* **28**, 2103-2119, doi:10.1101/gad.248005.114 (2014).
- 643 66 Pandey, S., Simmons, G. E., Jr., Malyarchuk, S., Calhoun, T. N. & Pruitt, K. A novel MeCP2  
644 acetylation site regulates interaction with ATRX and HDAC1. *Genes Cancer* **6**, 408-421,  
645 doi:10.18632/genesandcancer.84 (2015).
- 646 67 Kernohan, K. D., Vernimmen, D., Gloor, G. B. & Berube, N. G. Analysis of neonatal brain lacking  
647 ATRX or MeCP2 reveals changes in nucleosome density, CTCF binding and chromatin looping.  
648 *Nucleic Acids Res* **42**, 8356-8368, doi:10.1093/nar/gku564 (2014).
- 649 68 Baker, S. A. *et al.* An AT-hook domain in MeCP2 determines the clinical course of Rett syndrome  
650 and related disorders. *Cell* **152**, 984-996, doi:10.1016/j.cell.2013.01.038 (2013).
- 651 69 Kurahashi, H., Ohye, T., Inagaki, H., Kogo, H. & Tsutsumi, M. Mechanism of complex gross  
652 chromosomal rearrangements: a commentary on concomitant microduplications of MECP2 and  
653 ATRX in male patients with severe mental retardation. *J Hum Genet* **57**, 81-83,  
654 doi:10.1038/jhg.2011.143 (2012).
- 655 70 Kernohan, K. D. *et al.* ATRX partners with cohesin and MeCP2 and contributes to developmental  
656 silencing of imprinted genes in the brain. *Dev Cell* **18**, 191-202, doi:10.1016/j.devcel.2009.12.017  
657 (2010).
- 658 71 Nan, X. *et al.* Interaction between chromatin proteins MECP2 and ATRX is disrupted by mutations  
659 that cause inherited mental retardation. *Proc Natl Acad Sci U S A* **104**, 2709-2714,  
660 doi:10.1073/pnas.0608056104 (2007).
- 661 72 Watson, L. A. *et al.* Atrx deficiency induces telomere dysfunction, endocrine defects, and reduced  
662 life span. *J Clin Invest* **123**, 2049-2063, doi:10.1172/JCI65634 (2013).
- 663 73 Deng, Z. *et al.* Inherited mutations in the helicase RTEL1 cause telomere dysfunction and Hoyeraal-  
664 Hreidarsson syndrome. *Proc Natl Acad Sci U S A* **110**, E3408-3416, doi:10.1073/pnas.1300600110  
665 (2013).
- 666 74 Moog, U. *et al.* Subtelomeric chromosome aberrations: still a lot to learn. *Clin Genet* **68**, 397-407,  
667 doi:10.1111/j.1399-0004.2005.00506.x (2005).
- 668 75 De Vries, B. B., Winter, R., Schinzel, A. & van Ravenswaaij-Arts, C. Telomeres: a diagnosis at the  
669 end of the chromosomes. *J Med Genet* **40**, 385-398 (2003).

- 670 76 Tan, F. C., Hutchison, E. R., Eitan, E. & Mattson, M. P. Are there roles for brain cell senescence in  
671 aging and neurodegenerative disorders? *Biogerontology* **15**, 643-660, doi:10.1007/s10522-014-  
672 9532-1 (2014).
- 673 77 Miller, J. D. *et al.* Human iPSC-based modeling of late-onset disease via progerin-induced aging.  
674 *Cell Stem Cell* **13**, 691-705, doi:10.1016/j.stem.2013.11.006 (2013).
- 675 78 Zoghbi, H. Y. Rett Syndrome and the Ongoing Legacy of Close Clinical Observation. *Cell* **167**, 293-  
676 297, doi:10.1016/j.cell.2016.09.039 (2016).
- 677 79 Yang, L. Y. *et al.* Post-traumatic administration of the p53 inactivator pifithrin-alpha oxygen  
678 analogue reduces hippocampal neuronal loss and improves cognitive deficits after experimental  
679 traumatic brain injury. *Neurobiol Dis* **96**, 216-226, doi:10.1016/j.nbd.2016.08.012 (2016).
- 680 80 Zhang, P. *et al.* Regenerative repair of Pifithrin-alpha in cerebral ischemia via VEGF dependent  
681 manner. *Sci Rep* **6**, 26295, doi:10.1038/srep26295 (2016).
- 682 81 Yang, L. Y. *et al.* Post-trauma administration of the pifithrin-alpha oxygen analog improves  
683 histological and functional outcomes after experimental traumatic brain injury. *Exp Neurol* **269**,  
684 56-66, doi:10.1016/j.expneurol.2015.03.015 (2015).
- 685 82 Lindgren, A. G. *et al.* Loss of Pten causes tumor initiation following differentiation of murine  
686 pluripotent stem cells due to failed repression of Nanog. *PLoS One* **6**, e16478,  
687 doi:10.1371/journal.pone.0016478 (2011).
- 688 83 Patterson, M. *et al.* let-7 miRNAs Can Act through Notch to Regulate Human Gliogenesis. *Stem*  
689 *cell reports*, doi:10.1016/j.stemcr.2014.08.015 (2014).
- 690 84 Karumbayaram, S. *et al.* Directed differentiation of human-induced pluripotent stem cells  
691 generates active motor neurons. *Stem Cells* **27**, 806-811 (2009).
- 692 85 Lowry, W. E. *et al.* Generation of human induced pluripotent stem cells from dermal fibroblasts.  
693 *Proc Natl Acad Sci U S A* **105**, 2883-2888 (2008).

694

695

## 696 **Figure Legends**

### 697 **Figure 1. Generation of isogenic model of Rett Syndrome *in vitro***

698 **A**, Fibroblasts isolated from Rett Syndrome patients (R982 and R567) heterozygous for  
699 MECP2 mutations exhibit a mosaic pattern of MECP2 expression due to random XCI.

700 Note that roughly 50% of fibroblasts from each patient express MECP2. **B**, Multiple

701 isogenic hiPSC lines were produced from patient 982 with a typical Yamanaka protocol

702 yielding individual isogenic clones with and without MECP2 expression from the same

703 patient, as judged by NANOG and OCT4 staining. **C**, Specification of 982 patient derived

704 hiPSCs towards neural progenitor cells yielded homogenous cultures of NPCs with and

705 without MECP2. **D**, terminal differentiation of 982 patient derived NPCs towards neurons

706 and glial by growth factor withdrawal yielded normal neural derivatives as measured by  
707 immunostaining for MAP2 and GFAP. **E**, MECP2+ and MECP2- hiPSCs and neurons  
708 were generated from patient 982 (R982.16 and R982.15) and assayed for activity of the  
709 AKT pathway by western blot with antibodies that recognize the active forms of Akt and  
710 its downstream target S6. **F**, Sholl assay of dendritic complexity was performed on WT  
711 vs MUT neurons derived from patient 982. Increased # of branch points indicates  
712 increased dendritic complexity, measured as a function of distance from the cell body. \*p  
713 value < 0.05 according to student's t test. Bar graphs represent mean +/- SEM.

714

715 **Figure 2. Loss of MECP2 is associated with differential gene expression in neurons**

716 **A**, Immunostaining neurons generated from patient 982 for TuJ1, a neuronal-specific  
717 marker. **Right**, quantification of dendritic complexity by counting endpoints shows a  
718 significant difference between neurons with and without MECP2 made from patient 982.  
719 **B**, Volcano plots of differentially expressed genes (DEGs) in hiPSCs, NPCs and Neurons  
720 shows that loss of MECP2 has a profound effect on gene expression in neurons. **C**, Gene  
721 ontological analysis of DEGs increased versus decreased in MECP2 null neurons. **D**, An  
722 examination of SASP genes in neurons. A high proportion of SASP signature genes were  
723 upregulated in MECP2 null neurons versus WT neurons.

724

725 **Figure 3. Loss of MECP2 leads to senescence and signs of telomere dysfunction**

726 **A**, Cells undergoing senescence show upregulation of endogenous b-galactosidase  
727 activity. Patient skin-derived clones of fibroblasts lacking MECP2 showed strong b-gal

728 activity, while those of WT fibroblasts did not. **B**, TOP, The senescence assay applied to  
729 neural progenitors derived from Rett patients did not show significant senescence activity.  
730 BOTTOM, patient derived neuronal cultures showed a strong increase in the absence of  
731 MECP2 (quantification across independent lines shown on right). **C**, RT-PCR for p53  
732 targets after siRNA treatment of WT neurons.

733

734 **Figure 4. Loss of MECP2 leads to induction of DNA damage and p53**

735 **A**, Immunostaining patient NPCs, NPCs with siRNA against MECP2 and patient neurons  
736 in showed a strong increase in H2aX in the absence of MECP2. **B**, Immunostaining  
737 patient NPCs, NPCs with siRNA against MECP2 and patient neurons showed a strong  
738 increase in PML in the absence of MECP2. **C**, Immunostaining for p53 and p21, a target  
739 of p53, showed an increase of these stress markers in MECP2 null neurons. **D**,  
740 Immunostaining after siRNA silencing of MECP2 in WT neuronal cultures showed  
741 suppression of MECP2 and induction of P53 and PML levels. **E**, Treatment of MECP2-  
742 null neurons with DMSO or Pifithrin, followed by immunostaining with antibody for TuJ1  
743 shows a change in dendritic branching and morphology following treatment with Pifithrin.  
744 Bottom left, RT-PCR for GADD45, a p53 target gene, showed that Pifithrin reduced p53  
745 activity. Bottom right, Quantification of branching phenotype across three independent  
746 experiments showed a strong increase in branching as measured by the number of  
747 endpoints. In this figure, all data resulted from at least three independent experiments.  
748 \*p value<0.05 according to student's t test. Bar graphs represent mean +/- SEM.

749

750

751 **Figure S1. Validation of disease in a dish model for Rett Syndrome**

752 **A**, Teratoma assay was performed to establish pluripotency of hiPSCs made from Rett  
753 patient fibroblasts. The resulting tumors each showed evidence of differentiation towards  
754 all three embryonic germ layers. **B**, NPCs were produced from isogenic hiPSCs of Rett  
755 patient, and assessed by western blot to validate loss of MECP2 and specificity of  
756 antibody. Top panel shows that the antibody only recognizes MECP2. Bottom panel  
757 shows that in NPCs from both patients, individual clones either express or lack MECP2.  
758 **C**, The ability of hiPSCs to generate NPCs was assayed in Rosette formation assay. Lack  
759 of MECP2 did not affect rosette formation across multiple lines from both patients. N=4  
760 independent experiments. \*p value < 0.05 according to student's t test (for patient R567)  
761 or ANOVA (for patient R982). Bar graphs represent mean +/- SEM. **D**, Growth curves  
762 show that loss of MECP2 does not affect proliferation of NPCs made from either patient.  
763 **E**, 3 weeks of growth factor withdrawal drives NPCs to differentiate into neurons and glia  
764 as measured here by immunostaining for MAP2/Tuj1 or S100/GFAP in patient 567  
765 derived cultures. There was no consistent difference in differentiation potential across  
766 lines from either patient. N=2 independent experiments. Bar graphs represent mean +/-  
767 SEM. **F**, Patient 982 derived cultures also do not show dramatic differences in the  
768 presence of neurons or astrocytes as measured by MAP2 and S100. N=3 independent  
769 experiments. Bar graphs represent mean +/- SEM.

770

771 **Figure S2. RNA-seq analysis to determine the relative ration of WT versus MUT**  
772 **transcripts of MECP2 in Rett patient derived lines.**

773 **A and B**, immunostaining to demonstrate the efficiency of directed differentiation towards  
774 neural progenitors (A) and then onto interneurons (B) with markers typical of each stage.  
775 **C**, Detection of WT and MUT transcripts from each of the lines indicated demonstrated a  
776 clear bias towards individual alleles in each patient derived line. This analysis indicates  
777 XCI status for each allele, and demonstrates that XCI status is unchanged, even after  
778 differentiation to neurons.

779

### 780 **Figure S3. Silencing MECP2 by siRNA**

781 MECP2 was downregulated by RNA interference, quantified by RT-PCR (left), for protein  
782 by western blot (middle), and as demonstrated by immunostaining for MECP2 (right). N=3  
783 independent experiments. \*p value < 0.05 according to student's t test. Bar graphs  
784 represent mean +/- SEM.

785

786







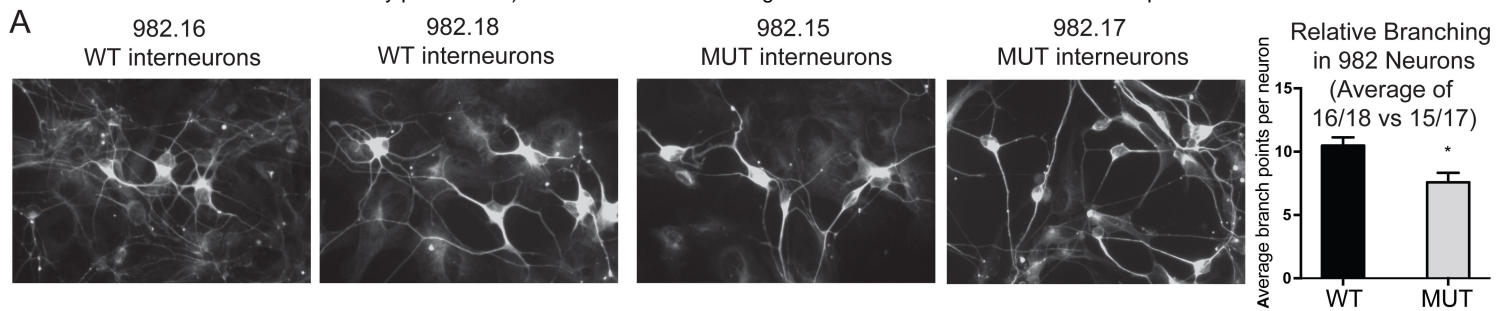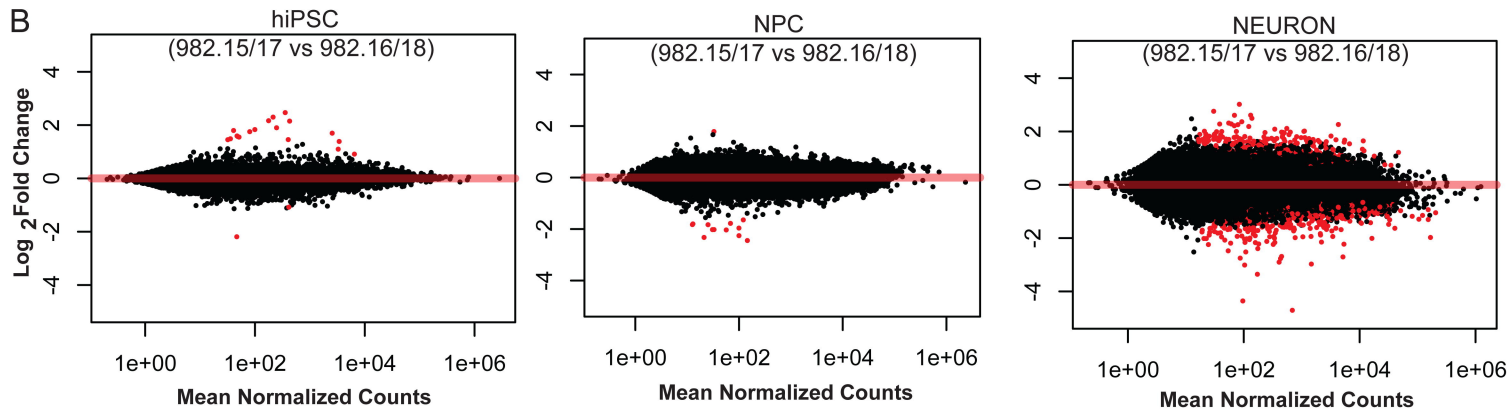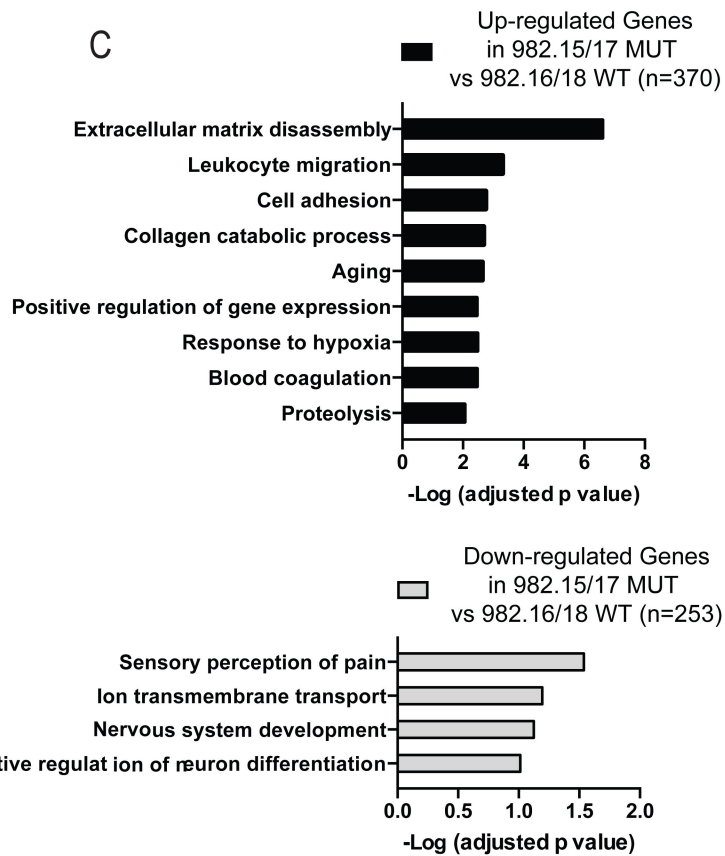

**D**

SASP signature genes up in MECP2 null Neurons

SASP signature genes down in MECP2 null Neurons

| Symbol  | Log <sub>2</sub> FC | FC SE | Stat  | p-value  | p-value adj |
|---------|---------------------|-------|-------|----------|-------------|
| DCN     | -2.23               | 0.24  | -9.47 | 2.93E-21 | 1.54E-17    |
| CXCL16  | -1.62               | 0.28  | -5.87 | 4.27E-09 | 2.04E-06    |
| MMP10   | -2.48               | 0.44  | -5.61 | 2.08E-08 | 7.99E-06    |
| COL3A1  | -1.98               | 0.37  | -5.40 | 6.85E-08 | 2.19E-05    |
| IGFBP7  | -1.42               | 0.27  | -5.34 | 9.17E-08 | 2.80E-05    |
| MMP14   | -1.08               | 0.21  | -5.23 | 1.68E-07 | 4.87E-05    |
| LAMA1   | -1.16               | 0.23  | -5.10 | 3.37E-07 | 8.68E-05    |
| CXCR4   | 1.31                | 0.26  | 4.99  | 6.07E-07 | 0.000141    |
| LAMB1   | -0.85               | 0.19  | -4.45 | 8.41E-06 | 0.001174    |
| CEBPB   | -1.27               | 0.29  | -4.33 | 1.50E-05 | 0.001875    |
| MMP1    | -1.93               | 0.45  | -4.26 | 2.04E-05 | 0.002365    |
| CCL5    | -2.02               | 0.49  | -4.16 | 3.19E-05 | 0.003363    |
| COL14A1 | -1.63               | 0.40  | -4.12 | 3.85E-05 | 0.003844    |
| COL4A4  | -1.01               | 0.25  | -4.03 | 5.53E-05 | 0.004875    |
| IL1B    | -0.99               | 0.27  | -3.64 | 0.000271 | 0.015985    |
| CBLC    | -1.55               | 0.44  | -3.55 | 0.000385 | 0.020095    |
| FN1     | -1.08               | 0.31  | -3.48 | 0.000499 | 0.023946    |
| TIMP2   | -0.74               | 0.21  | -3.46 | 0.000534 | 0.025106    |
| IL18    | -1.17               | 0.34  | -3.45 | 0.000554 | 0.025858    |
| VEGFC   | -0.91               | 0.27  | -3.41 | 0.000651 | 0.028877    |
| COL28A1 | 1.42                | 0.42  | 3.40  | 0.000669 | 0.029404    |
| CXCL10  | 1.50                | 0.45  | 3.35  | 0.000807 | 0.033022    |
| LAMA3   | -0.91               | 0.27  | -3.33 | 0.000855 | 0.03438     |
| COL11A2 | -1.18               | 0.36  | -3.31 | 0.000948 | 0.036945    |
| COL5A1  | -0.81               | 0.24  | -3.30 | 0.000973 | 0.037562    |
| COL1A1  | -1.18               | 0.37  | -3.24 | 0.001207 | 0.043787    |

A

GM07982 Fibroblast MECP2+ Clones      GM07982 Fibroblast MECP2- Clones

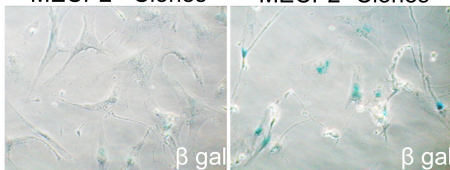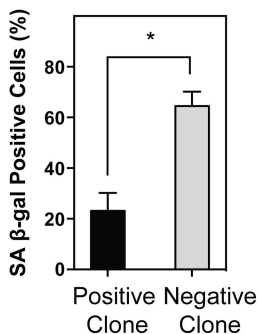

B

Patient NPCs  
982.16 WT      982.15 MUT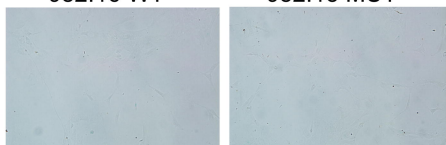Patient Neurons  
982.16 WT      982.15 MUT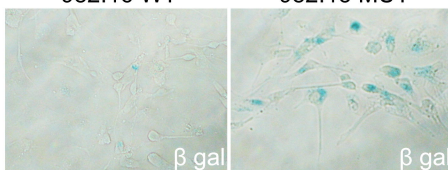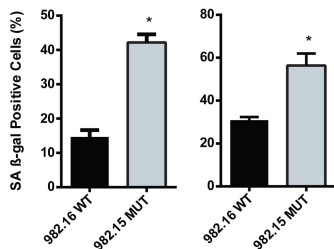

C

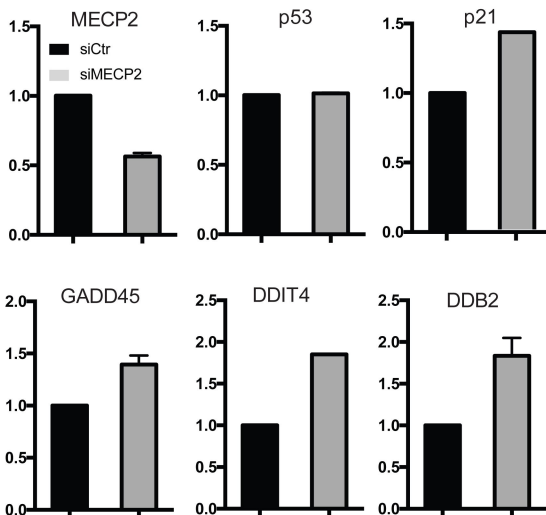

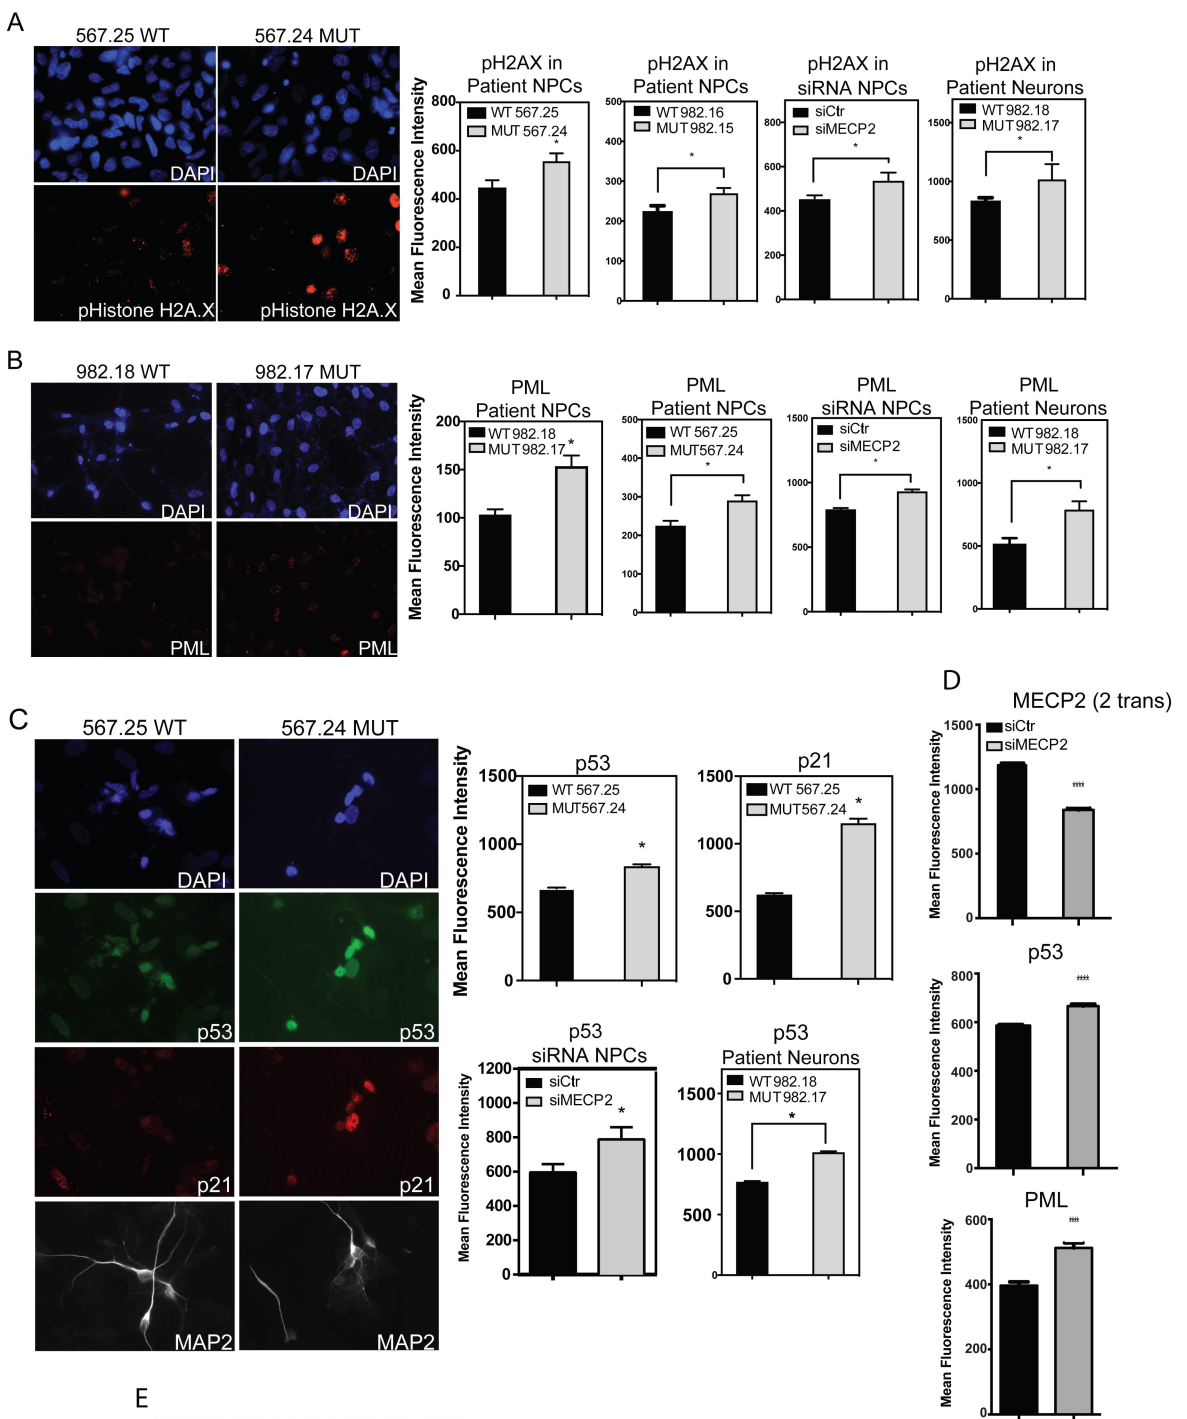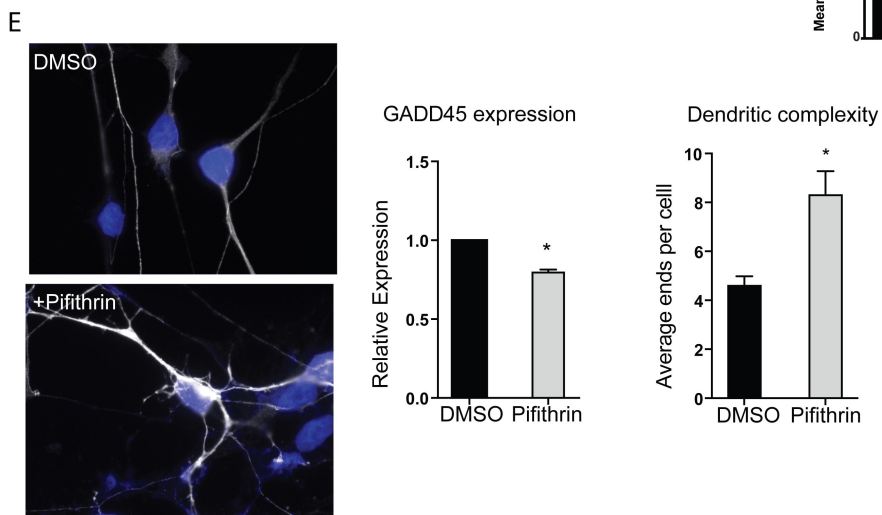

Source: https://www.biorxiv.org/content/10.1101/130401v2.full.pdf
